# Supplementary material for: Control of white mold (Sclerotinia sclerotiorum) through plant-mediated RNA interference
Source: Springer Nature journal article supplement (doi:10.1038/s41598-023-33335-4), 2023-04-20
Supplement: MOESM7 [file 41598_2023_33335_MOESM7_ESM.pdf]

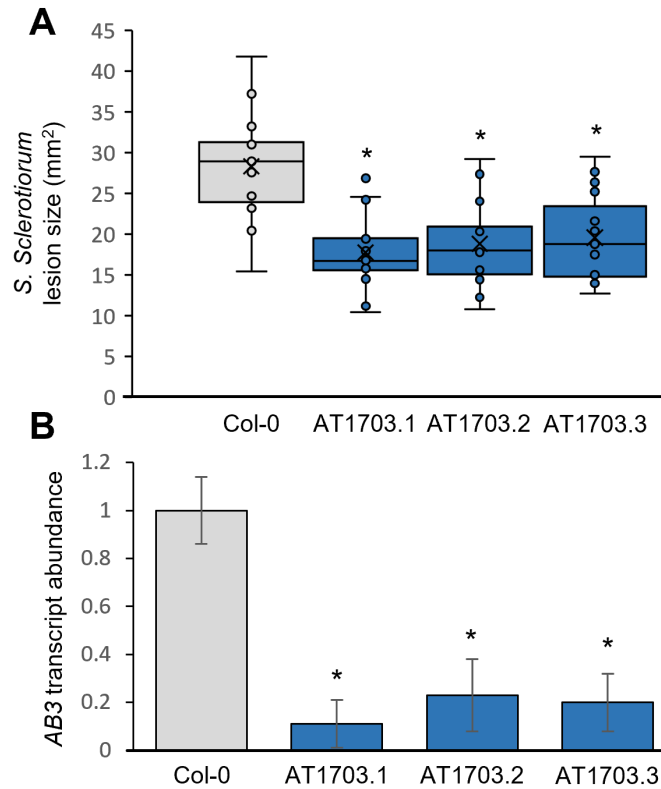

**Figure S1. *S. sclerotiorum* lesion size and AB3 transcript abundance in individual T2 generation AT1703 lines.** A) Sample size of n = 15 leaves per line were measured using ImageJ software and normalized to wild-type Col-0 leaves for lesion measurements. B) Target transcript abundance calculated using the  $\Delta\Delta CT$  method with Sac7 as a reference gene. Each line consists of 3 biological replicates, each containing three infected *A. thaliana* leaves. Error bars represent standard error and significance was determined using a student's t-test ( $p < 0.05$ ). \* = significance.
